## Correction

# Correction: Network pharmacology for the identification of phytochemicals in traditional Chinese medicine for COVID-19 that may regulate interleukin-6

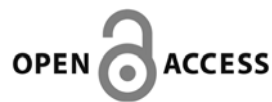

The authors of the original article “Network pharmacology for the identification of phytochemicals in traditional Chinese medicine for COVID-19 that may regulate interleukin-6” (Biosci Rep (2021) 41(1), <https://doi.org/10.1042/BSR20202583>) would like to correct the authorship of their article. The co-corresponding author Fei Peng had been removed from the main authorship line at proof by the author erroneously, though Fei Peng was still listed as a correspondence.

The correct authorship list is therefore as follows:

Wen-hao Niu<sup>1</sup>, Feng Wu<sup>2</sup>, Wen-yue Cao<sup>3</sup>, Zong-gui Wu<sup>1</sup>, Yu-Chieh Chao<sup>4</sup>, Fei Peng<sup>5</sup> and Chun Liang<sup>1</sup>

<sup>1</sup>Department of Cardiology, Shanghai Changzheng Hospital, Naval Medical University, Shanghai 200001, China; <sup>2</sup>Department of Cardiology, Yueyang Hospital of Integrated Traditional Chinese and Western Medicine, Affiliated hospital of Shanghai University of Traditional Chinese Medicine, Shanghai 200080, China; <sup>3</sup>Department of Ultrasound, Shanghai Chest Hospital, Shanghai Jiaotong University, Shanghai 200030, China; <sup>4</sup>Department of Anesthesiology, Shanghai Renji Hospital, School of Medicine, Shanghai Jiaotong University, Shanghai 200120, China; <sup>5</sup>Department of Nursing, Shanghai Changzheng Hospital, Naval Medical University, Shanghai 200001, China.

The live manuscript was corrected 23 February 2021.

Version of Record published:  
23 February 2021
